# Supplementary material for: Which isomer is better for charge transport: anti- or syn-?
Source: Royal Society of Chemistry journal article supplement (doi:10.1039/c9tc01268k), 2019-01-01
Supplement: c9tc01268k1.pdf [file c9tc01268k1.pdf]

## Supporting Information

### Which Isomer is Better for Charge Transport: *Anti-* or *Syn-*?

Peng Hu,<sup>ab</sup> Jun Ye<sup>\*c</sup> and Hui Jiang<sup>\*b</sup>

<sup>a</sup> School of Physics, Northwest University, Xi'an 710069, China

<sup>b</sup> School of Materials Science and Engineering, Nanyang Technological University,  
639798, Singapore. E-mail: [jianghui@ntu.edu.sg](mailto:jianghui@ntu.edu.sg)

<sup>c</sup> Institute of High Performance Computing, Agency for Science, Technology and  
Research, 138632, Singapore. E-mail: [yej@ihpc.a-star.edu.sg](mailto:yej@ihpc.a-star.edu.sg)

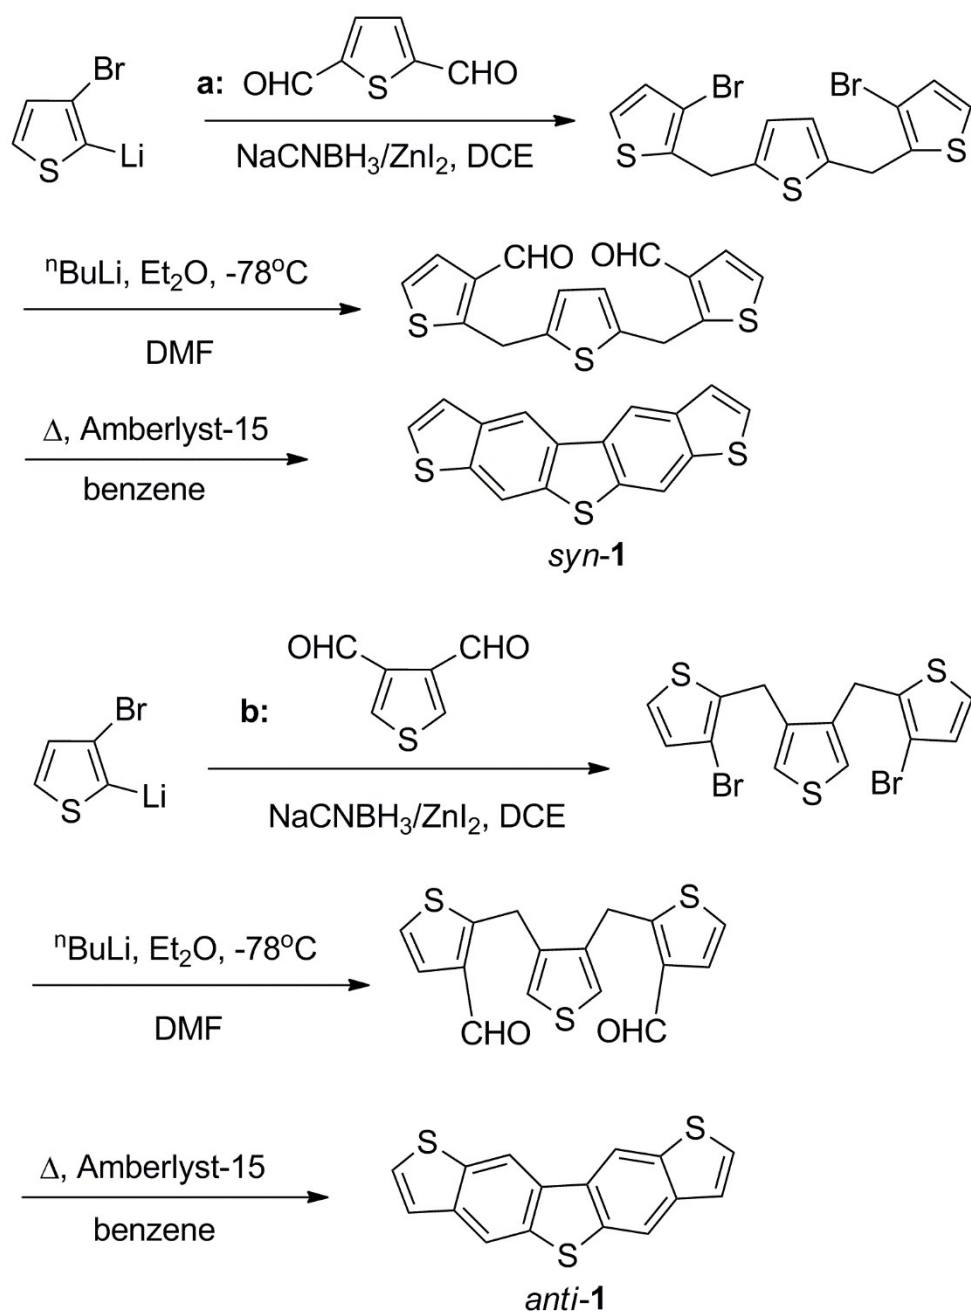

**Scheme S1** The synthetic routes for *syn-1* and *anti-1*.

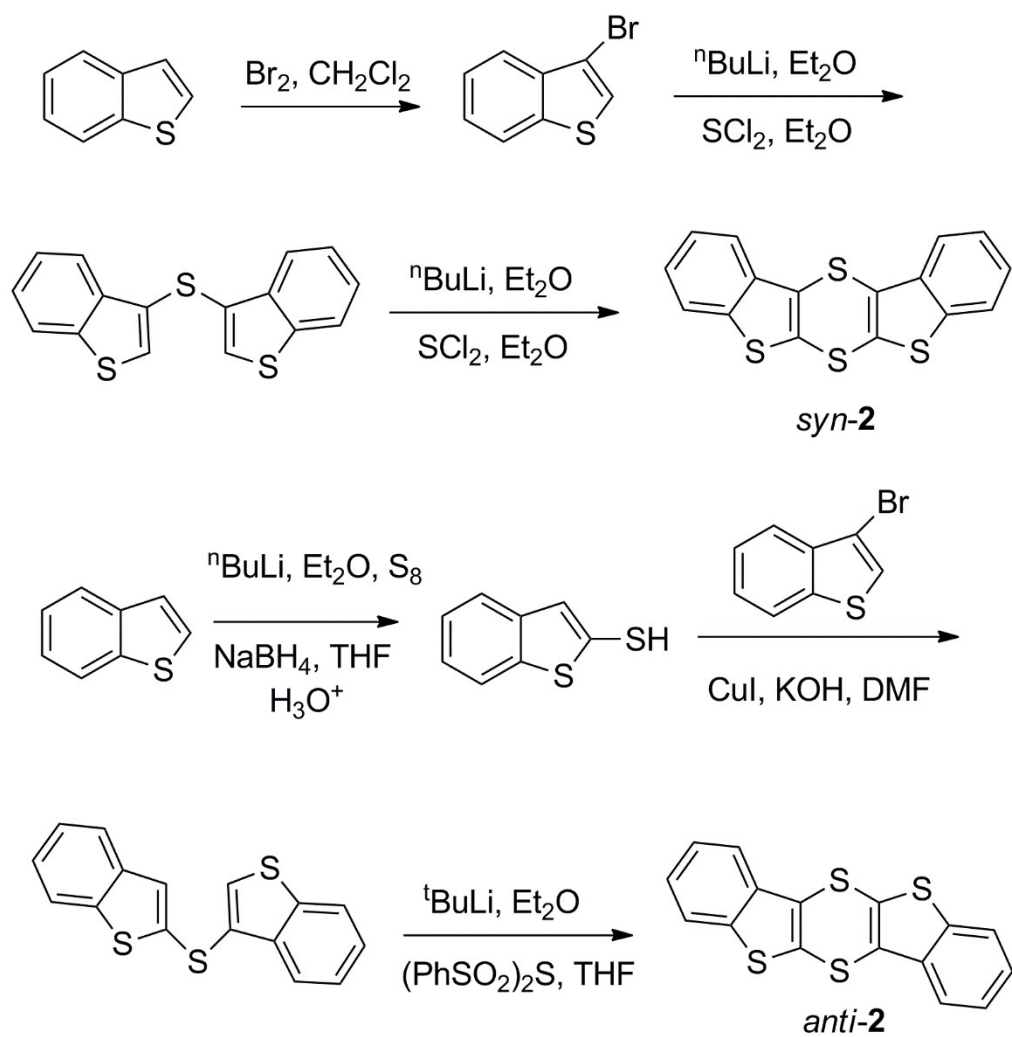

**Scheme S2** The synthetic routes for *syn-2* and *anti-2*.

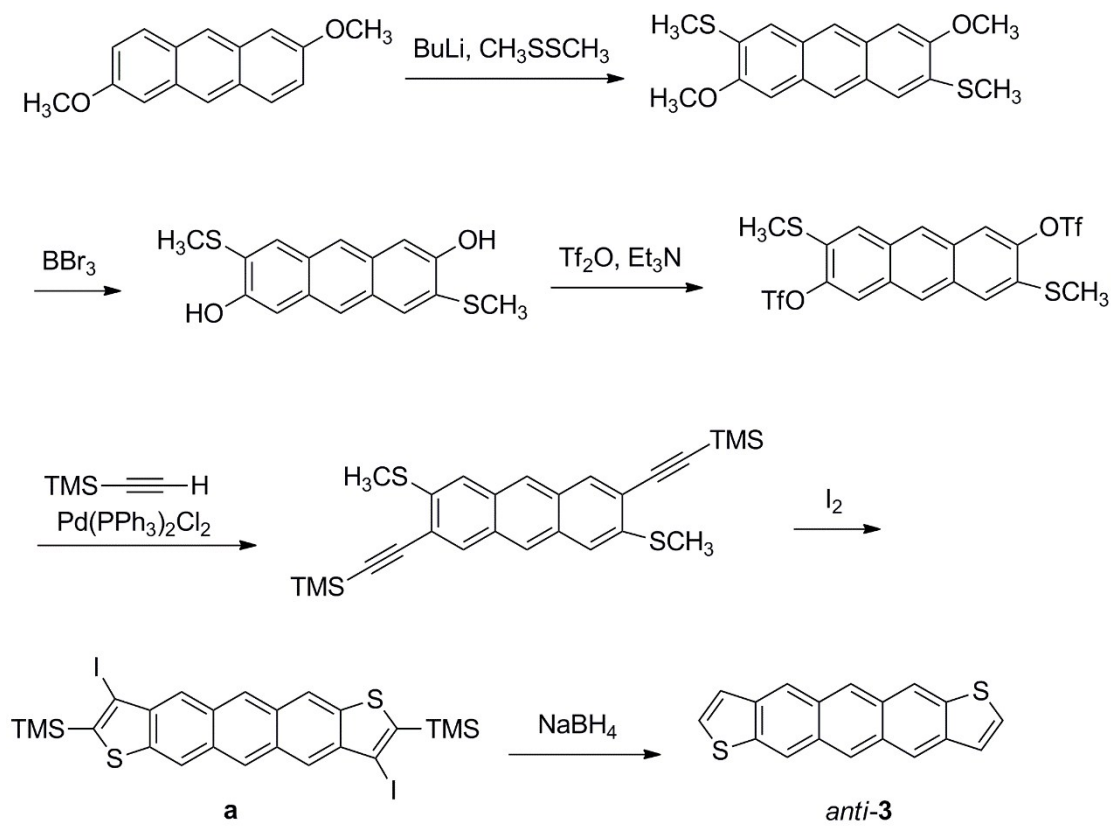

**Scheme S3** The synthetic routes for *anti-3*.

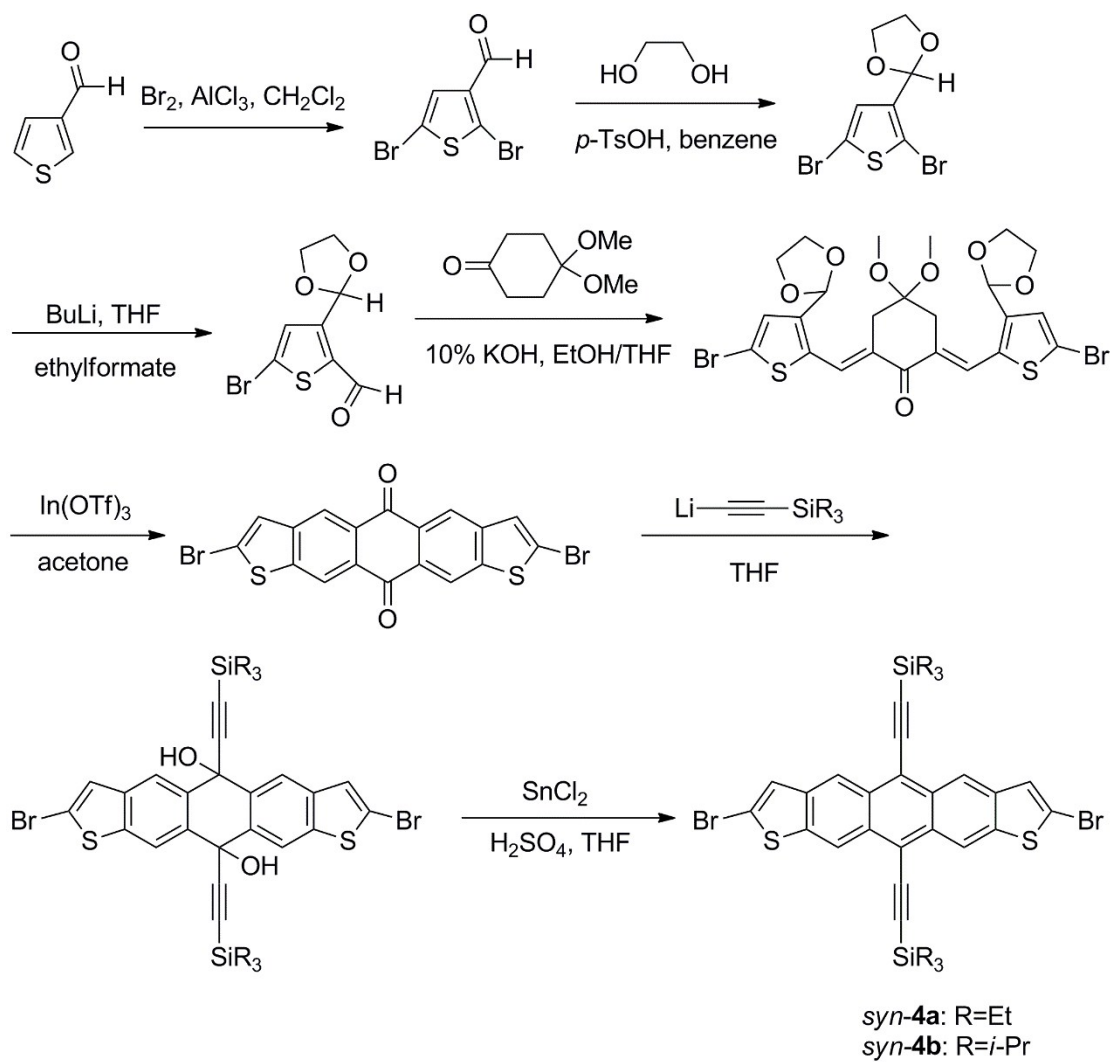

**Scheme S4** The synthetic routes for *syn*-ADT derivatives (*syn-4a* and *syn-4b*).

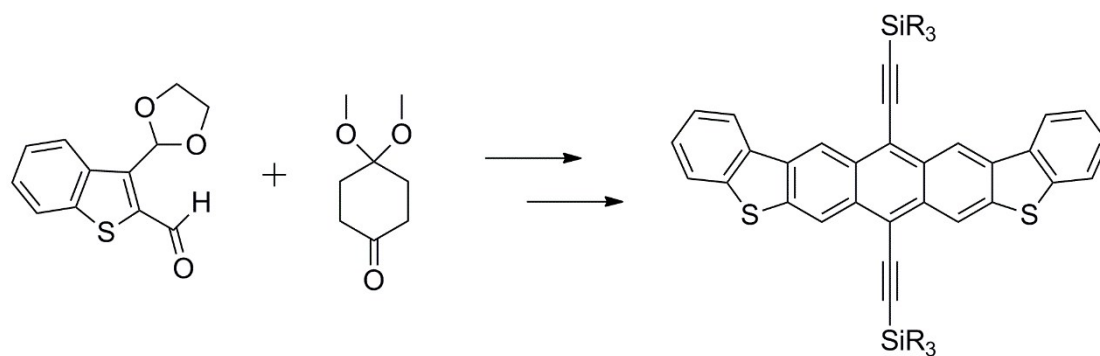

*syn-5a*: R=*i*-Pr<sub>3</sub>

*syn-5b*: R=*i*-Bu<sub>3</sub>

*syn-5c*: R=*n*-Bu<sub>3</sub>

**Scheme S5** The synthetic routes for *syn-5a*, *syn-5b*, and *syn-5c*.

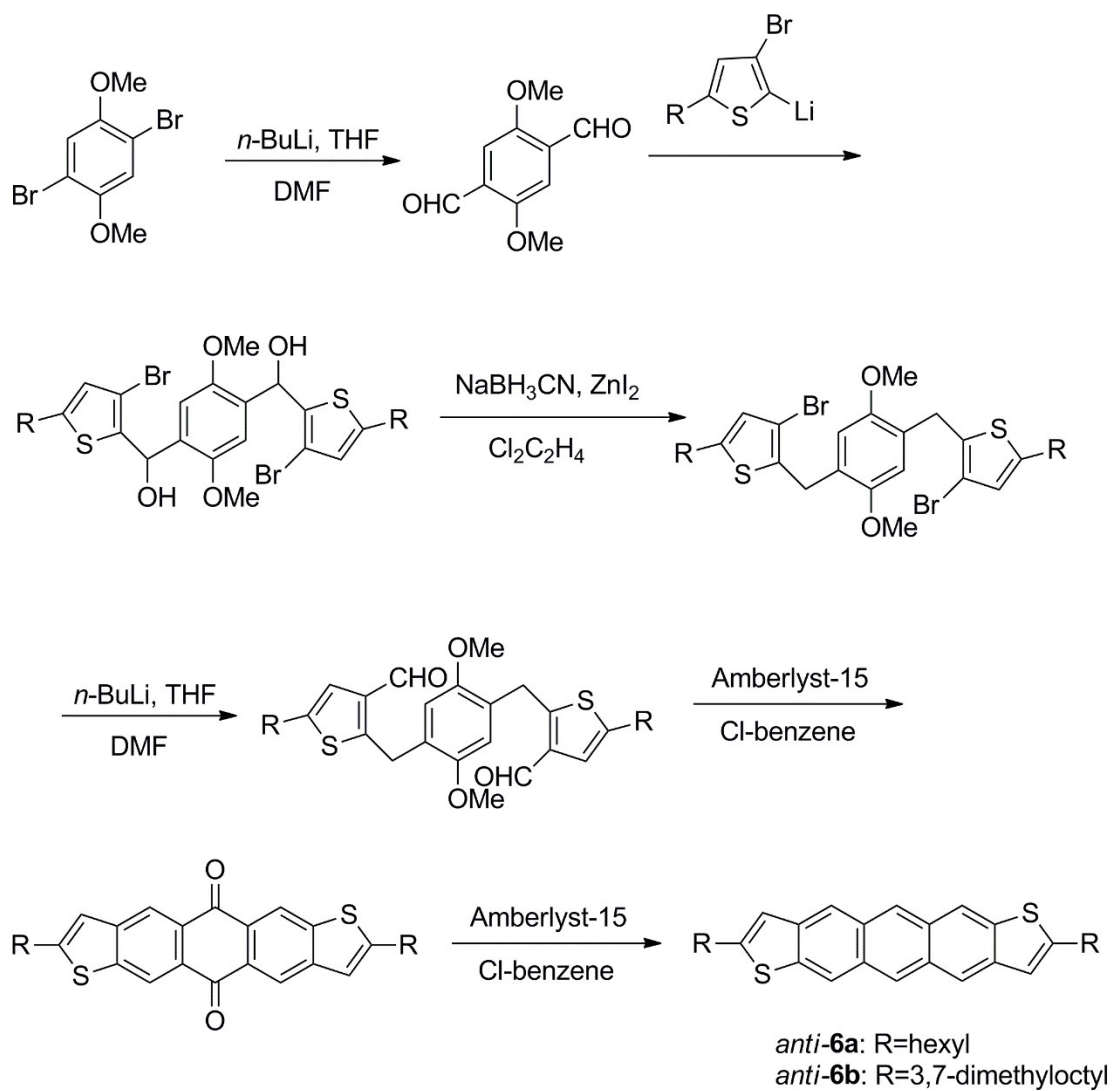

**Scheme S6** The synthetic routes for *anti-6a* and *anti-6b*).

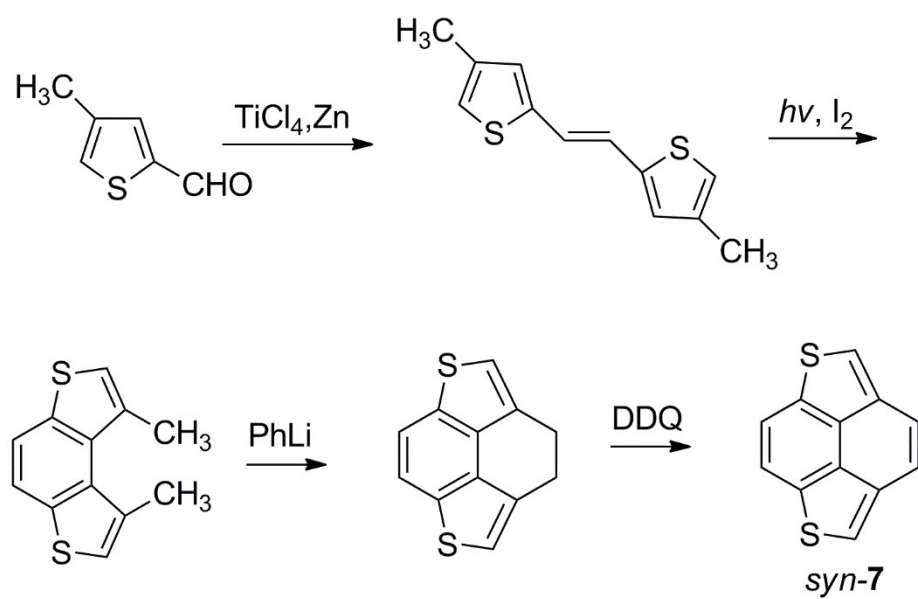

**Scheme S7** The synthetic routes for *syn-7*.



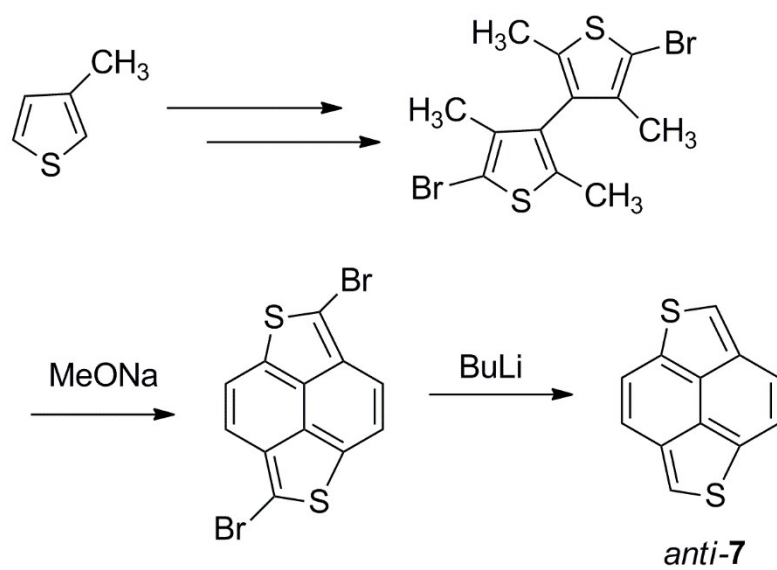

**Scheme S8** The synthetic routes for *anti*-7.

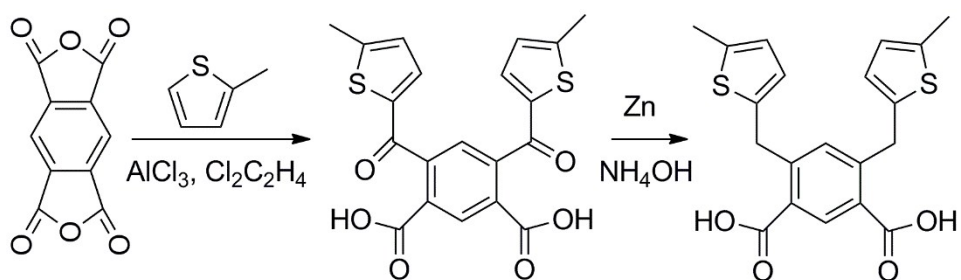

**a**

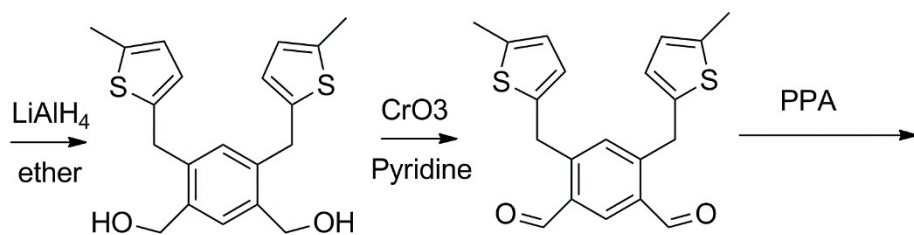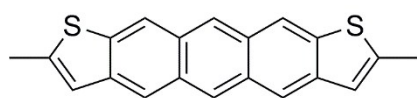

*syn-9*

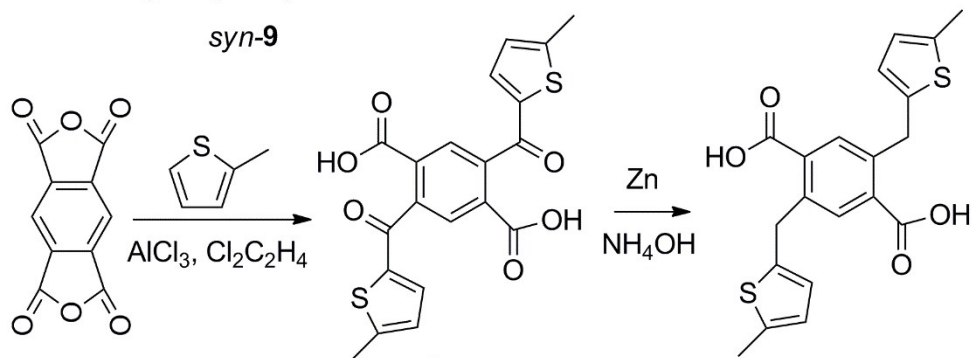

**b**

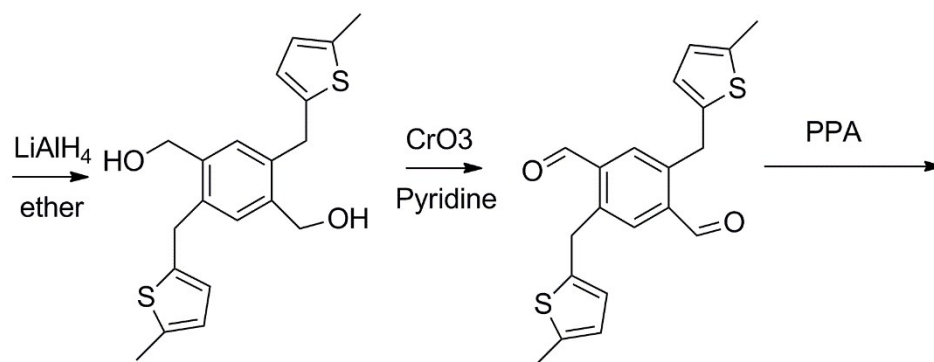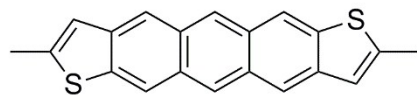

*anti-9*

**Scheme S9** The synthetic routes for *syn-9* and *anti-9*.
